# Supplementary material for: Complete Genome Sequencing and Comparative Genomic Analysis of the Thermotolerant Acetic Acid Bacterium, Acetobacter pasteurianus SKU1108, Provide a New Insight into Thermotolerance
Source: PubMed Central journal article supplement (PMC5158111; doi:10.1264/jsme2.me16023), 2016-09-24
Supplement: 31_395_s1.pdf [file 31_395_s1.pdf]

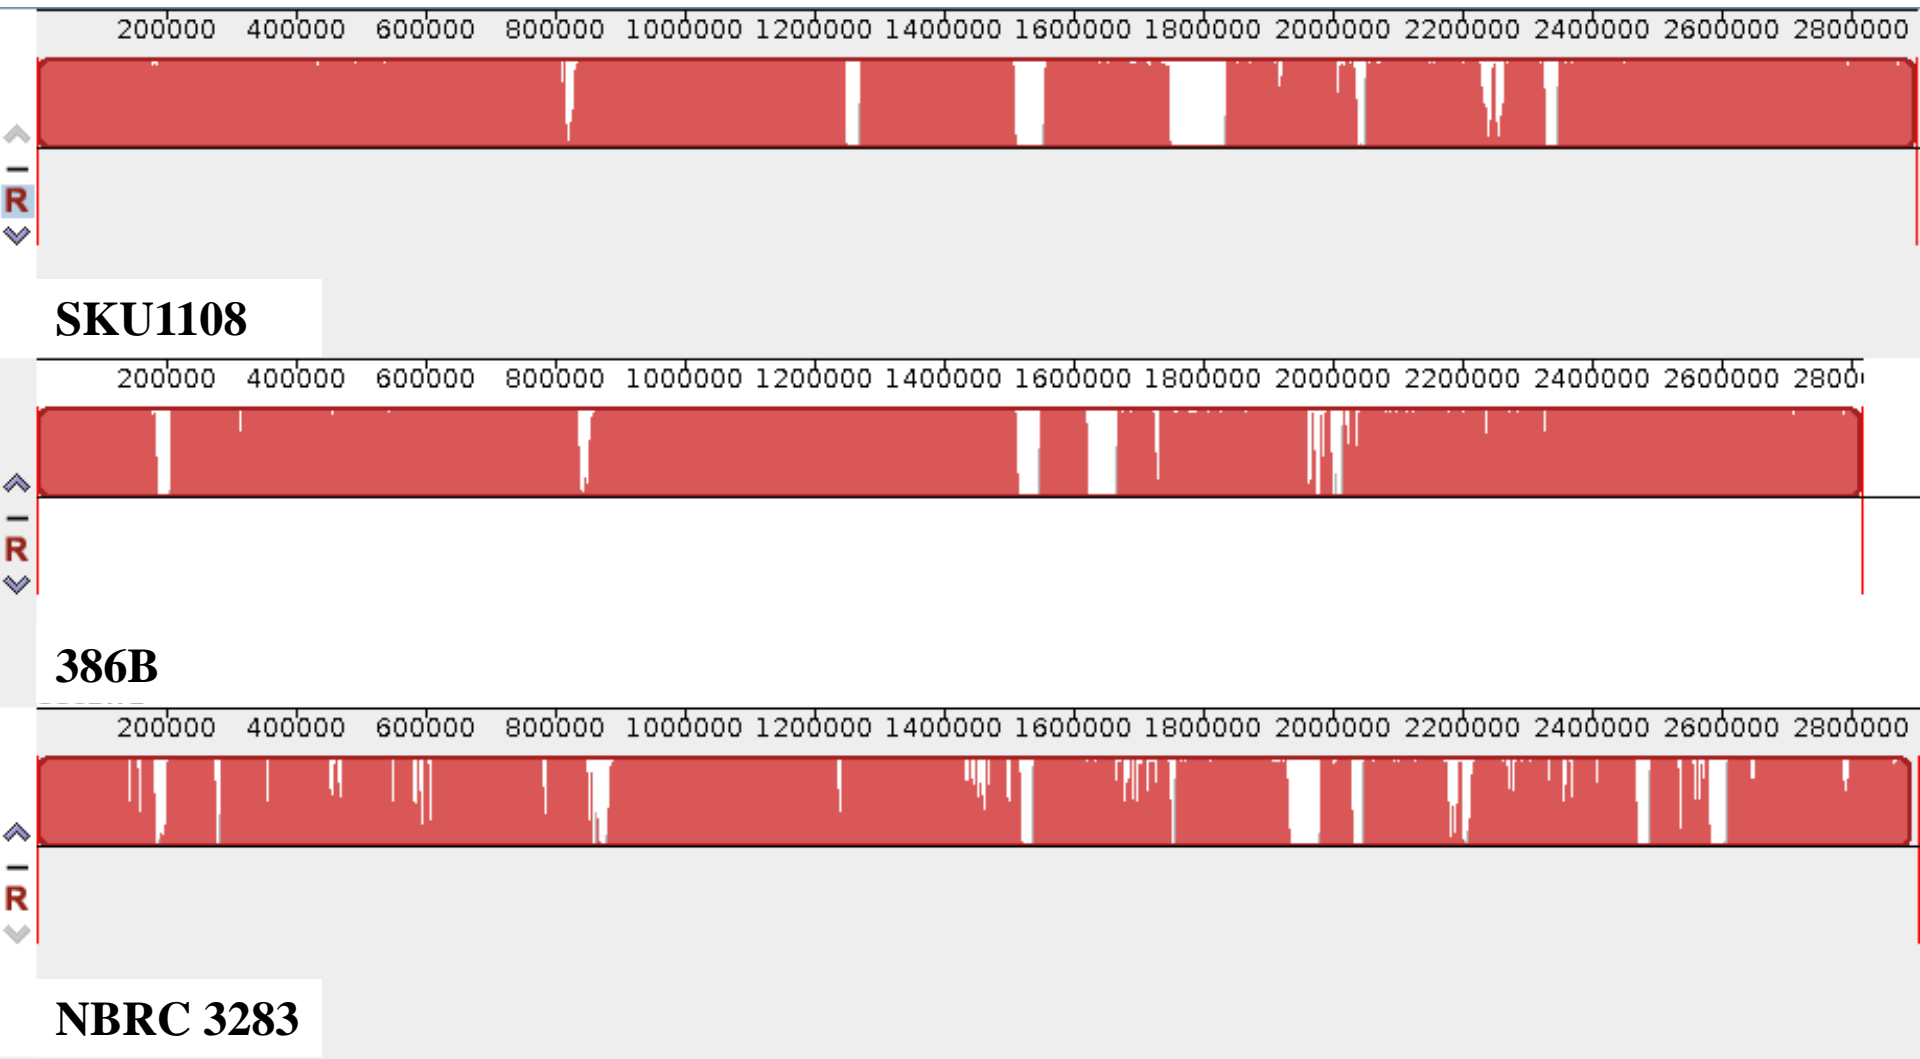

Fig. S1. Alignment of the *A. pasteurianus* SKU1108 genome to *A. pasteurianus* 386B, and *A. pasteurianus* NBRC 3283. Alignments were generated using progressiveMauve program with default parameter (Altschul *et al.* 1997. Nucleic Acids Res. 25:3389–3402).

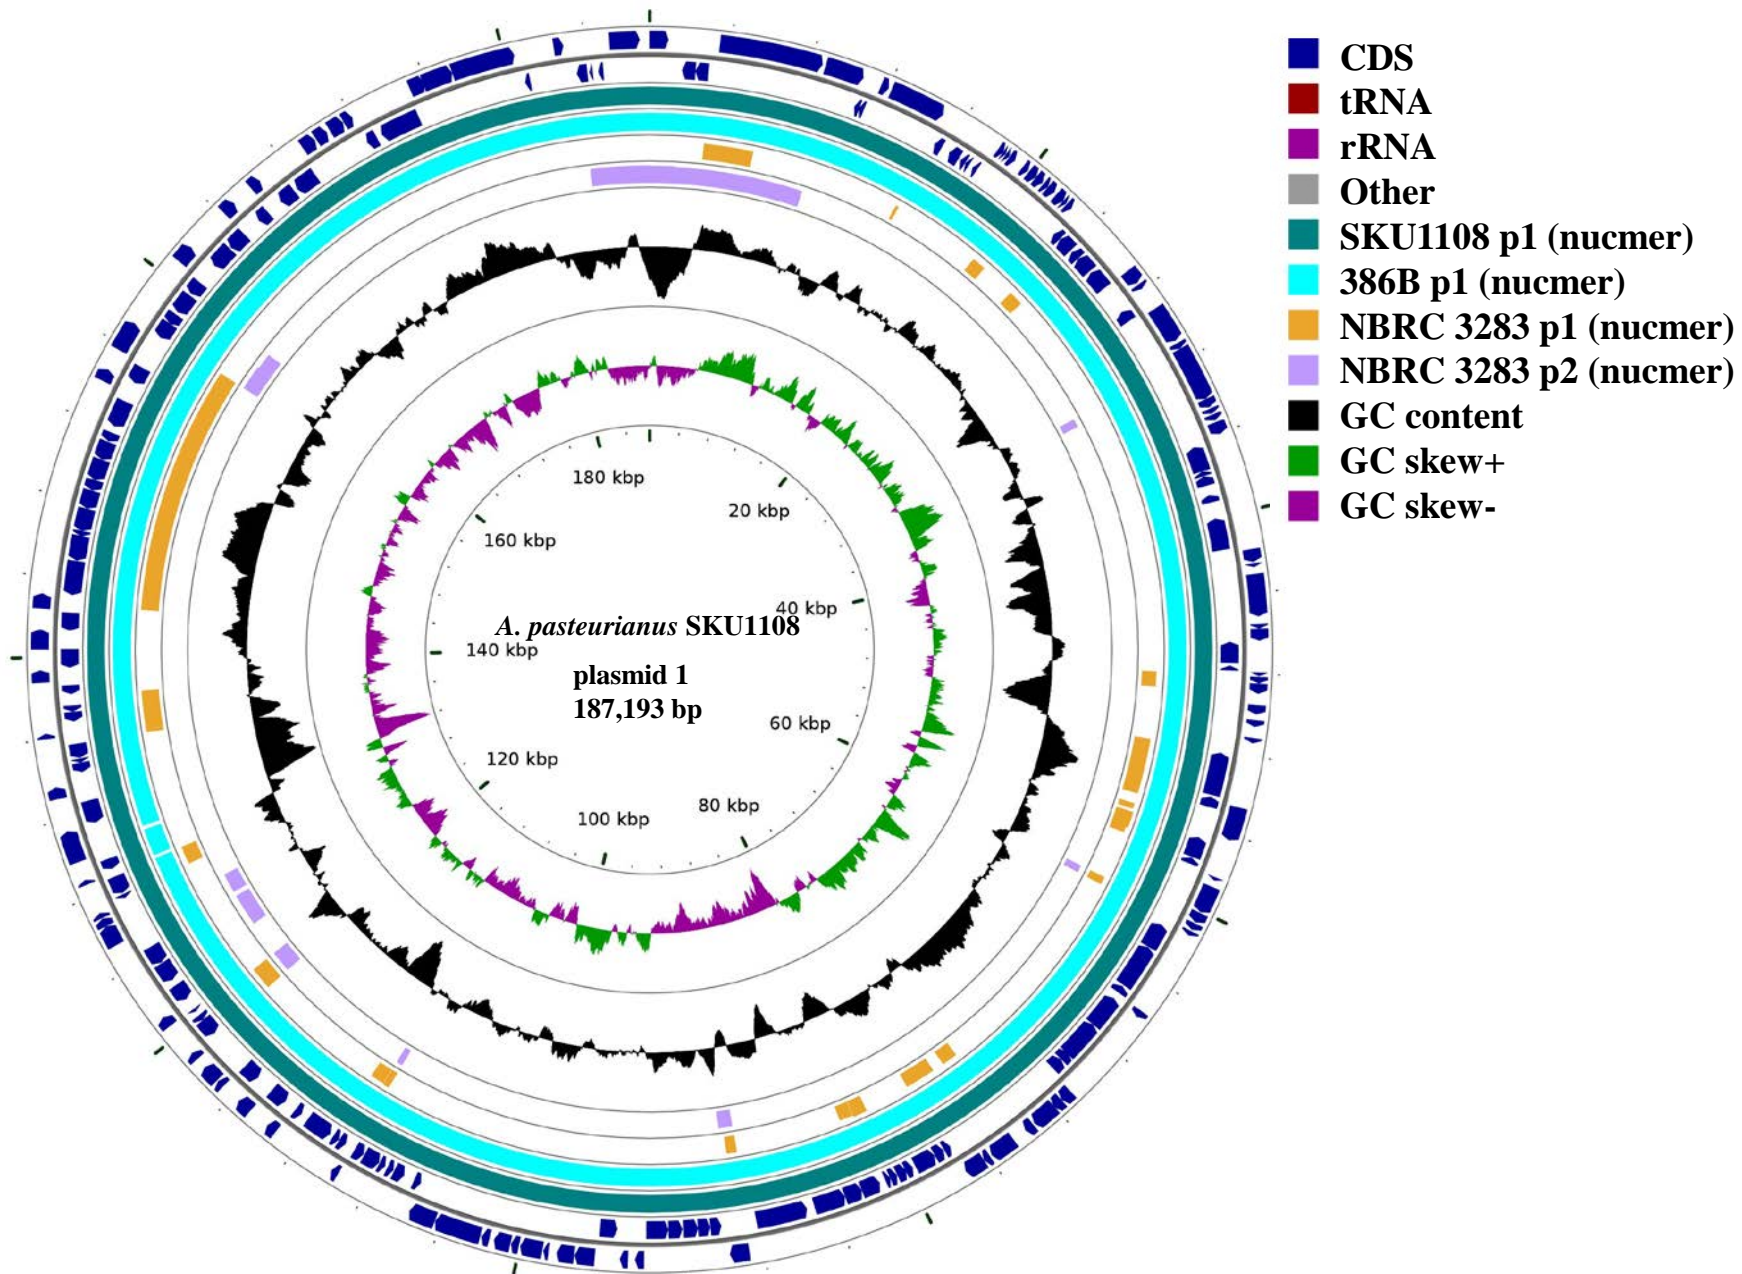

Fig. S2 Comparison view of the four large plasmid sequences of three strains. Plasmid sequences, SKU1108 (AP014882), 386B (HF677571), and NBRC 3283 (AP011122 and AP011123) were aligned and mapped onto large plasmid of SKU1108 (AP014882) using NUCmer. Figure was constructed by using CG-view.

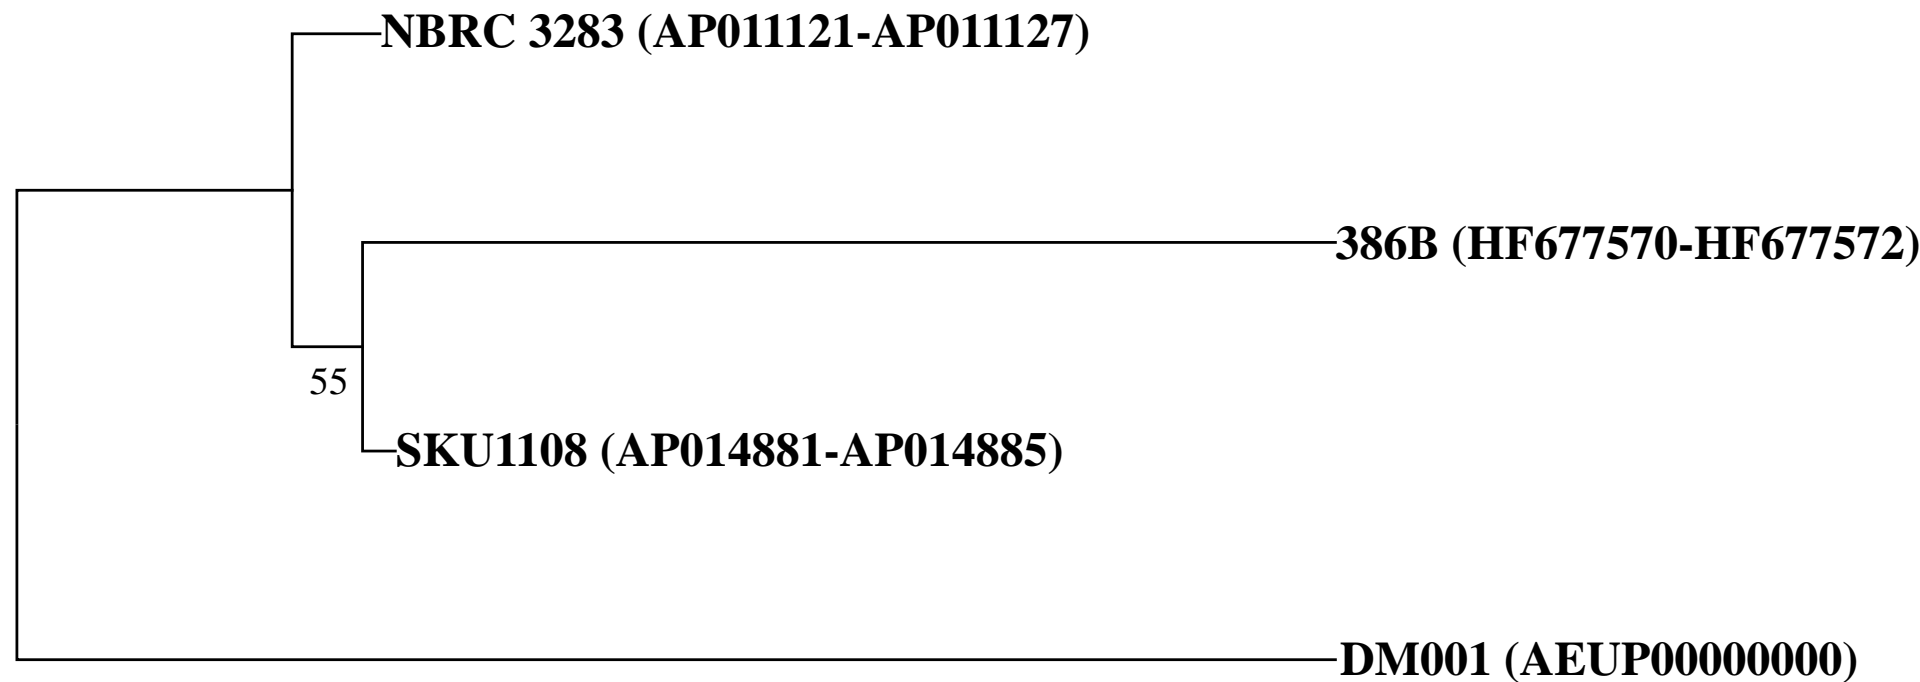

Fig. S3 Maximum-likelihood genome-based phylogenetic tree calculated with MUSCLE from 1,895 orthologous nucleotide sequences of *Acetobacter pasteurianus*. The orthologous set was identified as previously reported (Matsutani *et al.* 2015. *Appl. Microbiol. Biotechnol.* 99:7229–7240). The gene-support frequency (GSF) is shown (Suzuki *et al.* 2012. *BMC Genomics* 13:38). Draft genome sequence of *Acetobacter pomorum* DM001 strain was used as outgroup.

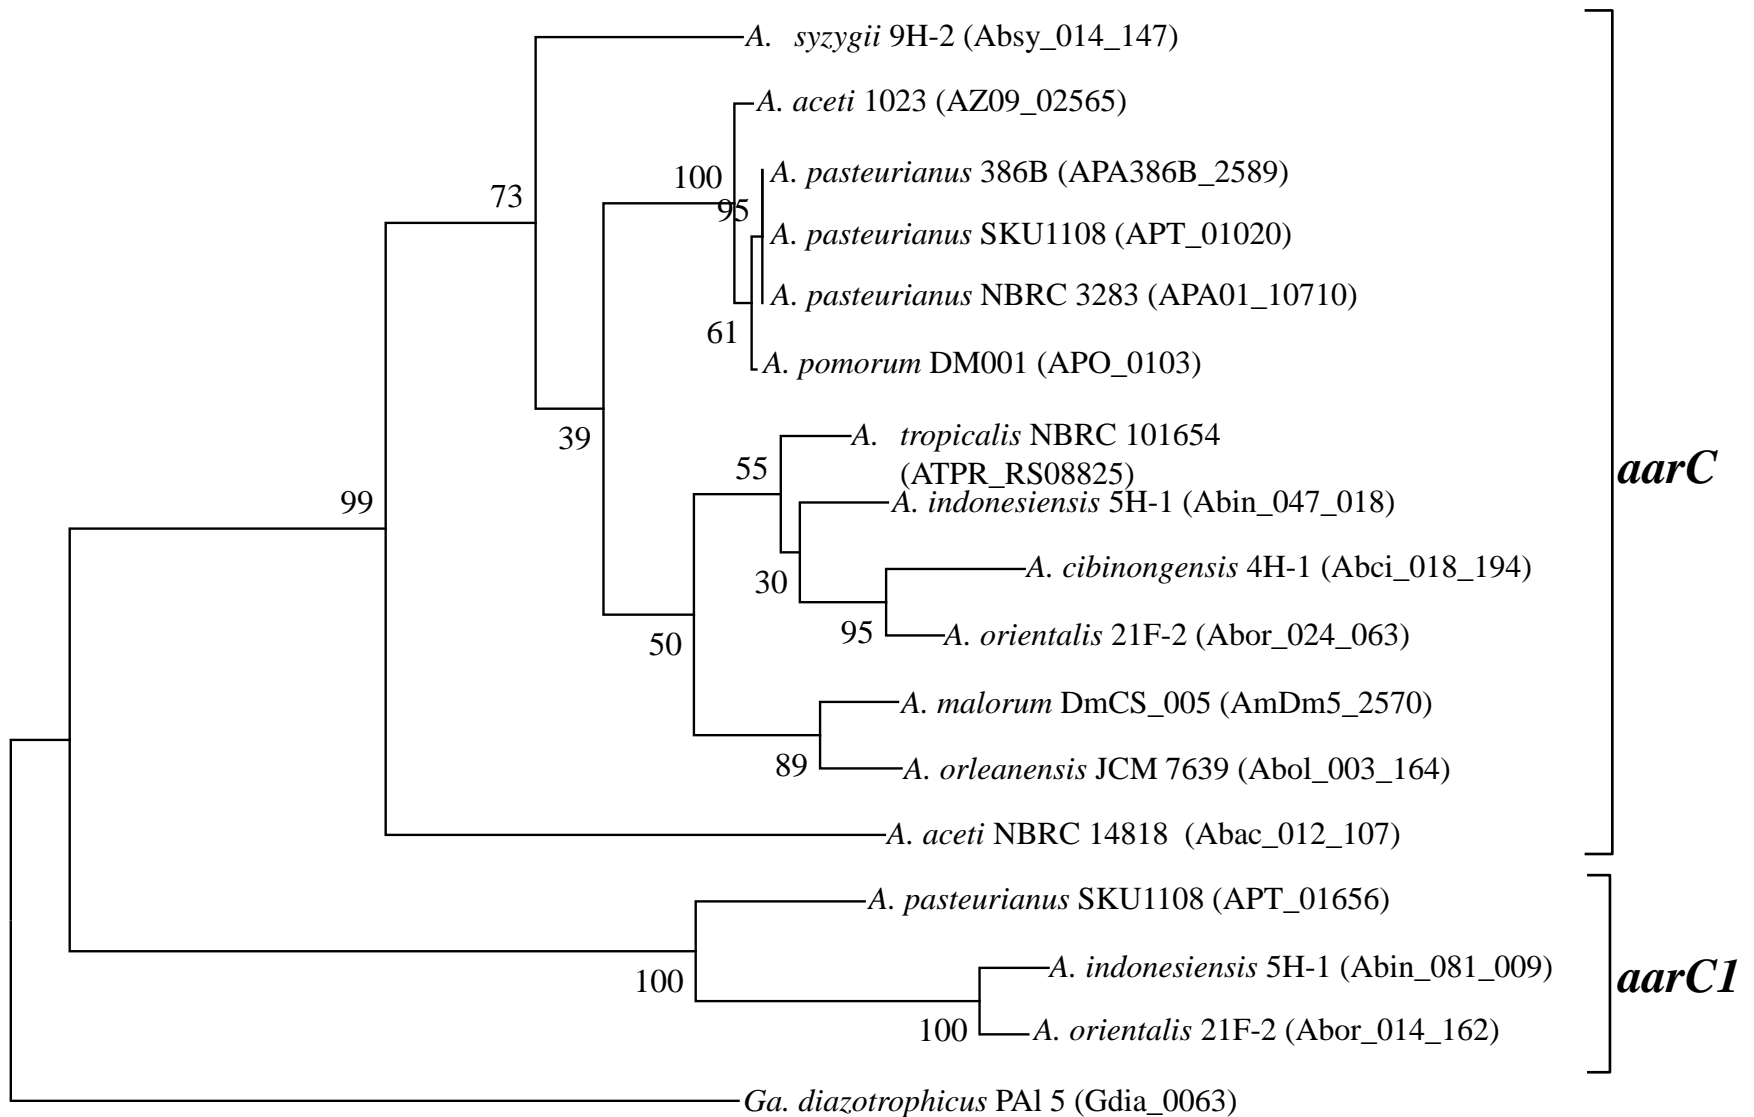

Fig. S4 Maximum-likelihood phylogenetic trees of selected *Acetobacter* species strains and their AarC proteins. The tree was prepared based on amino acid sequences of *aarC* gene of the 14 genomes. *Gluconacetobacter diazotrophicus* Pal 5 was used as an outgroup. Bootstrap values with 1,000 bootstrap replicates are shown. Locus tag of *aarC* genes are also shown.

Table S1. List of specific region of SKU1108. Two genomes, 386B and NBRC 3283, were mapped onto SKU1108 chromosome by using NUCmer. Unmapped regions of SKU1108 using each genome are shown. Specific region 1,4 and 6 is also conserved in 386B genome.

| specific region     | 386B    |         | NBRC 3283 |         |
|---------------------|---------|---------|-----------|---------|
|                     | initial | end     | initial   | end     |
| specific region 1   | -       | -       | 158468    | 184478  |
| specific region 2   | 816475  | 828978  | 817153    | 824283  |
| specific region 3   | 1248995 | 1269982 | 1248995   | 1269982 |
| specific region 4   | -       | -       | 1453808   | 1489478 |
| specific region 5   | 1510344 | 1555927 | 1505616   | 1555929 |
| specific region 6   | -       | -       | 1726953   | 1737279 |
| specific region 7   | 1748925 | 1835024 | 1749641   | 1835024 |
| specific region 8   | 2037496 | 2049733 | 2032875   | 2049733 |
| specific region 9   | 2231021 | 2265703 | 2238986   | 2246200 |
| specific region 9-1 | -       | -       | 2255003   | 2256312 |
| specific region 10  | 2328919 | 2346998 | 2328799   | 2346998 |

Table S2. List of genes encoded in specific region of SKU1108. Specific region 1,4 and 6 is also conserved in 386B genome.

| specific region   | locus_tag | gene        | product                                                  | GenBank       |         |         |
|-------------------|-----------|-------------|----------------------------------------------------------|---------------|---------|---------|
|                   |           |             |                                                          | accession No. | start   | end     |
| specific region 1 | APT_00139 | -           | hypothetical protein                                     | AP014881      | 160750  | 157595  |
| specific region 1 | APT_00140 | -           | glycosyl transferase                                     | AP014881      | 162027  | 160756  |
| specific region 1 | APT_00141 | -           | hypothetical protein                                     | AP014881      | 162981  | 162472  |
| specific region 1 | APT_00142 | -           | hypothetical protein                                     | AP014881      | 164210  | 162981  |
| specific region 1 | APT_00143 | <i>amiF</i> | formamidase                                              | AP014881      | 164589  | 165596  |
| specific region 1 | APT_00144 | <i>luxR</i> | LuxR family transcriptional regulator                    | AP014881      | 166542  | 165643  |
| specific region 1 | APT_00145 | -           | two-component hybrid sensor and regulator                | AP014881      | 170021  | 166539  |
| specific region 1 | APT_00146 | <i>urtA</i> | urea ABC transporter periplasmic protein                 | AP014881      | 170022  | 171359  |
| specific region 1 | APT_00147 | <i>urtB</i> | urea ABC transporter permease                            | AP014881      | 171414  | 172340  |
| specific region 1 | APT_00148 | <i>urtC</i> | urea ABC transporter permease                            | AP014881      | 172352  | 173467  |
| specific region 1 | APT_00149 | <i>urtD</i> | urea ABC transporter ATP-binding protein                 | AP014881      | 173479  | 174225  |
| specific region 1 | APT_00150 | <i>urtE</i> | urea ABC transporter ATP-binding protein                 | AP014881      | 174242  | 174958  |
| specific region 1 | APT_00151 | -           | hypothetical protein                                     | AP014881      | 175590  | 175159  |
| specific region 1 | APT_00152 | -           | putative phage integrase                                 | AP014881      | 176026  | 175772  |
| specific region 1 | APT_00153 | -           | hypothetical protein                                     | AP014881      | 175796  | 176230  |
| specific region 1 | APT_00154 | -           | hypothetical protein                                     | AP014881      | 178202  | 176394  |
| specific region 1 | APT_00155 | -           | hypothetical protein                                     | AP014881      | 178580  | 178227  |
| specific region 1 | APT_00156 | <i>cpo</i>  | non-heme chloroperoxidase                                | AP014881      | 179754  | 178918  |
| specific region 1 | APT_00157 | -           | transcriptional regulator MerR                           | AP014881      | 179836  | 180363  |
| specific region 1 | APT_00158 | -           | protease/amidase                                         | AP014881      | 181052  | 180360  |
| specific region 1 | APT_00159 | -           | hypothetical protein                                     | AP014881      | 181203  | 182123  |
| specific region 1 | APT_00160 | -           | hypothetical protein                                     | AP014881      | 182413  | 183375  |
| specific region 1 | APT_00161 | -           | hypothetical protein                                     | AP014881      | 183350  | 183733  |
| specific region 1 | APT_00162 | -           | phage integrase                                          | AP014881      | 185447  | 183624  |
| specific region 2 | APT_00776 | -           | hypothetical protein                                     | AP014881      | 818517  | 817801  |
| specific region 2 | APT_00777 | -           | hypothetical protein                                     | AP014881      | 818586  | 818993  |
| specific region 2 | APT_00778 | -           | hypothetical protein                                     | AP014881      | 818938  | 820053  |
| specific region 2 | APT_00779 | -           | hypothetical protein                                     | AP014881      | 820057  | 820155  |
| specific region 2 | APT_00780 | -           | hypothetical protein                                     | AP014881      | 821007  | 820432  |
| specific region 2 | APT_00781 | -           | uncharacterized phage-associated protein-like protein    | AP014881      | 821509  | 821000  |
| specific region 2 | APT_00782 | -           | prophage integrase                                       | AP014881      | 823304  | 822042  |
| specific region 3 | APT_01192 | -           | phage integrase                                          | AP014881      | 1249079 | 1250281 |
| specific region 3 | APT_01193 | -           | hypothetical protein                                     | AP014881      | 1250396 | 1251232 |
| specific region 3 | APT_01194 | -           | phage associated-antirepressor BRO                       | AP014881      | 1252135 | 1251380 |
| specific region 3 | APT_01195 | -           | hypothetical protein                                     | AP014881      | 1252503 | 1252132 |
| specific region 3 | APT_01196 | -           | hypothetical protein                                     | AP014881      | 1252855 | 1253754 |
| specific region 3 | APT_01197 | -           | hypothetical protein                                     | AP014881      | 1255147 | 1253840 |
| specific region 3 | APT_01198 | -           | hypothetical protein                                     | AP014881      | 1255459 | 1255250 |
| specific region 3 | APT_01199 | -           | hypothetical protein                                     | AP014881      | 1256228 | 1255536 |
| specific region 3 | APT_01200 | -           | hypothetical protein                                     | AP014881      | 1256458 | 1256294 |
| specific region 3 | APT_01201 | -           | phage related lysozyme                                   | AP014881      | 1256953 | 1256495 |
| specific region 3 | APT_01202 | -           | hypothetical protein                                     | AP014881      | 1257342 | 1257130 |
| specific region 3 | APT_01203 | -           | terminase                                                | AP014881      | 1258088 | 1257375 |
| specific region 3 | APT_01204 | -           | prophage terminase small subunit                         | AP014881      | 1258674 | 1258078 |
| specific region 3 | APT_01205 | -           | endonuclease                                             | AP014881      | 1259203 | 1258874 |
| specific region 3 | APT_01206 | -           | hypothetical protein                                     | AP014881      | 1259832 | 1259200 |
| specific region 3 | APT_01207 | -           | phage DNA recombinase                                    | AP014881      | 1260745 | 1259870 |
| specific region 3 | APT_01208 | -           | hypothetical protein                                     | AP014881      | 1261306 | 1260896 |
| specific region 3 | APT_01209 | -           | hypothetical protein                                     | AP014881      | 1262171 | 1261443 |
| specific region 3 | APT_01210 | -           | hypothetical protein                                     | AP014881      | 1262703 | 1262200 |
| specific region 3 | APT_01211 | -           | hypothetical protein                                     | AP014881      | 1262975 | 1262724 |
| specific region 3 | APT_01212 | -           | hypothetical protein                                     | AP014881      | 1264129 | 1262972 |
| specific region 3 | APT_01213 | -           | hypothetical protein                                     | AP014881      | 1264616 | 1264122 |
| specific region 3 | APT_01214 | -           | hypothetical protein                                     | AP014881      | 1265090 | 1264632 |
| specific region 3 | APT_01215 | -           | hypothetical protein                                     | AP014881      | 1265368 | 1265763 |
| specific region 3 | APT_01216 | -           | hypothetical protein                                     | AP014881      | 1265955 | 1266512 |
| specific region 3 | APT_01217 | -           | hypothetical protein                                     | AP014881      | 1266766 | 1267023 |
| specific region 3 | APT_01218 | -           | hypothetical protein                                     | AP014881      | 1267020 | 1267250 |
| specific region 3 | APT_01219 | -           | hypothetical protein                                     | AP014881      | 1267250 | 1267471 |
| specific region 3 | APT_01220 | -           | RelA/SpoT protein                                        | AP014881      | 1268637 | 1267642 |
| specific region 3 | APT_01221 | -           | putative phage associated protein                        | AP014881      | 1269707 | 1268634 |
| specific region 4 | APT_01365 | <i>pigA</i> | heme oxygenase                                           | AP014881      | 1453538 | 1454104 |
| specific region 4 | APT_01366 | -           | hypothetical protein                                     | AP014881      | 1454522 | 1454178 |
| specific region 4 | APT_01367 | <i>hmuV</i> | hemin importer ATP-binding subunit                       | AP014881      | 1455331 | 1454522 |
| specific region 4 | APT_01368 | <i>hmuU</i> | transmembrane permease component of haem ABC transporter | AP014881      | 1456383 | 1455328 |
| specific region 4 | APT_01369 | <i>hmuT</i> | hemin ABC transporter hemin-binding protein              | AP014881      | 1457366 | 1456380 |
| specific region 4 | APT_01370 | -           | hypothetical protein                                     | AP014881      | 1457734 | 1457366 |
| specific region 4 | APT_01371 | <i>mntR</i> | manganese transport regulator MntR                       | AP014881      | 1458401 | 1457919 |
| specific region 4 | APT_01372 | <i>mntH</i> | manganese transport protein MntH                         | AP014881      | 1458587 | 1459960 |
| specific region 4 | APT_01373 | -           | hypothetical protein                                     | AP014881      | 1460103 | 1460384 |
| specific region 4 | APT_01374 | -           | hypothetical protein                                     | AP014881      | 1461041 | 1460442 |
| specific region 4 | APT_01375 | -           | hypothetical protein                                     | AP014881      | 1461347 | 1461901 |
| specific region 4 | APT_01376 | -           | hypothetical protein                                     | AP014881      | 1462443 | 1463585 |
| specific region 4 | APT_01377 | -           | alpha/beta hydrolase                                     | AP014881      | 1463582 | 1464610 |
| specific region 4 | APT_01378 | <i>amt</i>  | ammonium transporter                                     | AP014881      | 1465964 | 1464663 |
| specific region 4 | APT_01379 | -           | hypothetical protein                                     | AP014881      | 1466264 | 1466010 |
| specific region 4 | APT_01380 | <i>tynA</i> | tyramine oxidase                                         | AP014881      | 1468535 | 1466331 |

|                   |           |             |                                                             |          |         |         |
|-------------------|-----------|-------------|-------------------------------------------------------------|----------|---------|---------|
| specific region 4 | APT_01381 | -           | hypothetical protein                                        | AP014881 | 1468502 | 1469512 |
| specific region 4 | APT_01382 | -           | hypothetical protein                                        | AP014881 | 1469853 | 1469521 |
| specific region 4 | APT_01383 | -           | low-affinity zinc transport protein                         | AP014881 | 1471078 | 1469846 |
| specific region 4 | APT_01384 | -           | NADH:flavin oxidoreductase                                  | AP014881 | 1472859 | 1471786 |
| specific region 4 | APT_01385 | -           | short-chain dehydrogenase/reductase SDR                     | AP014881 | 1473700 | 1472954 |
| specific region 4 | APT_01386 | -           | AraC family transcriptional regulator                       | AP014881 | 1473854 | 1474768 |
| specific region 4 | APT_01387 | -           | metallophosphoesterase                                      | AP014881 | 1475953 | 1474838 |
| specific region 4 | APT_01388 | -           | TetR family transcriptional regulator                       | AP014881 | 1476772 | 1476152 |
| specific region 4 | APT_01389 | <i>xdhB</i> | xanthine dehydrogenase XdhB                                 | AP014881 | 1476885 | 1479017 |
| specific region 4 | APT_01390 | <i>xdhA</i> | xanthine dehydrogenase XdhA                                 | AP014881 | 1479014 | 1480342 |
| specific region 4 | APT_01391 | -           | outer membrane protein                                      | AP014881 | 1482388 | 1480421 |
| specific region 4 | APT_01392 | -           | outer membrane protein                                      | AP014881 | 1484281 | 1482527 |
| specific region 4 | APT_01393 | -           | bacteriocin/lantibiotic exporter permease                   | AP014881 | 1486927 | 1484750 |
| specific region 4 | APT_01394 | <i>eamA</i> | transporter EamA                                            | AP014881 | 1488291 | 1486927 |
| specific region 4 | APT_01395 | -           | hypothetical protein                                        | AP014881 | 1488768 | 1488367 |
| specific region 4 | APT_01396 | -           | hypothetical protein                                        | AP014881 | 1488896 | 1488783 |
| specific region 5 | APT_01415 | <i>hsdS</i> | type I restriction-modification enzyme S subunit            | AP014881 | 1510325 | 1511524 |
| specific region 5 | APT_01416 | <i>hsdR</i> | type I site-specific deoxyribonuclease                      | AP014881 | 1511554 | 1514850 |
| specific region 5 | APT_01417 | -           | metal-dependent hydrolase                                   | AP014881 | 1514853 | 1515590 |
| specific region 5 | APT_01418 | -           | hypothetical protein                                        | AP014881 | 1515787 | 1515599 |
| specific region 5 | APT_01419 | -           | glycosyl transferase                                        | AP014881 | 1517242 | 1516082 |
| specific region 5 | APT_01420 | -           | beta-ketoacyl synthase                                      | AP014881 | 1519032 | 1517242 |
| specific region 5 | APT_01421 | -           | polyketide synthase                                         | AP014881 | 1525325 | 1519035 |
| specific region 5 | APT_01422 | -           | probable long-chain fatty-acid-CoA ligase                   | AP014881 | 1526829 | 1525354 |
| specific region 5 | APT_01423 | -           | outer membrane protein                                      | AP014881 | 1529698 | 1526918 |
| specific region 5 | APT_01424 | -           | hypothetical protein                                        | AP014881 | 1529946 | 1530227 |
| specific region 5 | APT_01425 | -           | transposase                                                 | AP014881 | 1530288 | 1530635 |
| specific region 5 | APT_01426 | -           | IS4 family transposase                                      | AP014881 | 1530656 | 1531045 |
| specific region 5 | APT_01427 | -           | hypothetical protein                                        | AP014881 | 1536520 | 1531055 |
| specific region 5 | APT_01428 | -           | hypothetical protein                                        | AP014881 | 1538160 | 1536517 |
| specific region 5 | APT_01429 | -           | protein kinase                                              | AP014881 | 1542302 | 1538166 |
| specific region 5 | APT_01430 | -           | type I restriction-modification system S subunit            | AP014881 | 1543711 | 1542302 |
| specific region 5 | APT_01431 | -           | type I restriction-modification system, M subunit, putative | AP014881 | 1545732 | 1543708 |
| specific region 5 | APT_01432 | <i>kdpB</i> | potassium-transporting ATPase subunit B                     | AP014881 | 1547777 | 1545729 |
| specific region 5 | APT_01433 | -           | transcriptional regulator                                   | AP014881 | 1548103 | 1548459 |
| specific region 5 | APT_01434 | -           | IS4 family transposase                                      | AP014881 | 1548883 | 1548494 |
| specific region 5 | APT_01435 | -           | transposase                                                 | AP014881 | 1549251 | 1548904 |
| specific region 5 | APT_01436 | -           | hypothetical protein                                        | AP014881 | 1549482 | 1550297 |
| specific region 5 | APT_01437 | -           | hypothetical protein                                        | AP014881 | 1551832 | 1550426 |
| specific region 5 | APT_01438 | -           | lytic transglycosylase                                      | AP014881 | 1552697 | 1552026 |
| specific region 5 | APT_01439 | -           | hypothetical protein                                        | AP014881 | 1553035 | 1552694 |
| specific region 5 | APT_01440 | -           | conjugal transfer protein TraF                              | AP014881 | 1553318 | 1553094 |
| specific region 5 | APT_01441 | -           | IS4 family transposase                                      | AP014881 | 1553735 | 1553346 |
| specific region 5 | APT_01442 | -           | transposase                                                 | AP014881 | 1554103 | 1553756 |
| specific region 5 | APT_01443 | -           | putative DNA recombinase                                    | AP014881 | 1554290 | 1555756 |
| specific region 6 | APT_01586 | -           | outer membrane protein                                      | AP014881 | 1727849 | 1725477 |
| specific region 6 | APT_01587 | -           | hypothetical protein                                        | AP014881 | 1728314 | 1727922 |
| specific region 6 | APT_01588 | <i>lysR</i> | LysR family transcriptional regulator                       | AP014881 | 1728687 | 1729634 |
| specific region 6 | APT_01589 | -           | TonB-dependent siderophore receptor                         | AP014881 | 1731990 | 1729684 |
| specific region 6 | APT_01590 | -           | hypothetical protein                                        | AP014881 | 1732675 | 1732325 |
| specific region 6 | APT_01591 | -           | hypothetical protein                                        | AP014881 | 1734225 | 1732672 |
| specific region 6 | APT_01592 | -           | hypothetical protein                                        | AP014881 | 1734513 | 1734229 |
| specific region 6 | APT_01593 | <i>ufrA</i> | TonB-dependent siderophore receptor                         | AP014881 | 1737167 | 1734513 |
| specific region 7 | APT_01606 | -           | transposase                                                 | AP014881 | 1749701 | 1750048 |
| specific region 7 | APT_01607 | -           | IS4 family transposase                                      | AP014881 | 1750069 | 1750458 |
| specific region 7 | APT_01608 | -           | hypothetical protein                                        | AP014881 | 1751785 | 1750616 |
| specific region 7 | APT_01609 | -           | hypothetical protein                                        | AP014881 | 1752066 | 1752173 |
| specific region 7 | APT_01610 | -           | transcriptional regulator                                   | AP014881 | 1752250 | 1752792 |
| specific region 7 | APT_01611 | -           | Cupin 2 conserved barrel domain protein                     | AP014881 | 1752828 | 1753217 |
| specific region 7 | APT_01612 | -           | hypothetical protein                                        | AP014881 | 1753239 | 1754147 |
| specific region 7 | APT_01613 | -           | cupin 2 domain-containing protein                           | AP014881 | 1754704 | 1754333 |
| specific region 7 | APT_01614 | -           | major facilitator superfamily AmpG-like permease            | AP014881 | 1755906 | 1754701 |
| specific region 7 | APT_01615 | -           | hypothetical protein                                        | AP014881 | 1758036 | 1756003 |
| specific region 7 | APT_01616 | -           | regulator protein PchR                                      | AP014881 | 1758223 | 1759107 |
| specific region 7 | APT_01617 | <i>xyIP</i> | xylose-proton symporter                                     | AP014881 | 1760711 | 1759407 |
| specific region 7 | APT_01618 | -           | hypothetical protein                                        | AP014881 | 1761689 | 1761132 |
| specific region 7 | APT_01619 | -           | hypothetical protein                                        | AP014881 | 1762246 | 1761923 |
| specific region 7 | APT_01620 | -           | hypothetical protein                                        | AP014881 | 1763513 | 1762599 |
| specific region 7 | APT_01621 | -           | hypothetical protein                                        | AP014881 | 1763525 | 1763812 |
| specific region 7 | APT_01622 | <i>ntrR</i> | transcriptional regulator NtrR                              | AP014881 | 1764311 | 1763901 |
| specific region 7 | APT_01623 | -           | antitoxin                                                   | AP014881 | 1764536 | 1764312 |
| specific region 7 | APT_01624 | -           | hypothetical protein                                        | AP014881 | 1764714 | 1764980 |
| specific region 7 | APT_01625 | -           | hypothetical protein                                        | AP014881 | 1765599 | 1766636 |
| specific region 7 | APT_01626 | -           | transposase                                                 | AP014881 | 1766729 | 1767019 |
| specific region 7 | APT_01627 | -           | DEAD/DEAH box helicase-like                                 | AP014881 | 1770205 | 1767626 |
| specific region 7 | APT_01628 | -           | hypothetical protein                                        | AP014881 | 1770795 | 1770202 |
| specific region 7 | APT_01629 | -           | restriction endonuclease                                    | AP014881 | 1771250 | 1771945 |
| specific region 7 | APT_01630 | -           | acetyltransferase                                           | AP014881 | 1772437 | 1773078 |
| specific region 7 | APT_01631 | -           | hypothetical protein                                        | AP014881 | 1773603 | 1773953 |
| specific region 7 | APT_01632 | -           | hypothetical protein                                        | AP014881 | 1773944 | 1774693 |
| specific region 7 | APT_01633 | -           | hypothetical protein                                        | AP014881 | 1774839 | 1775594 |
| specific region 7 | APT_01634 | -           | hypothetical protein                                        | AP014881 | 1775636 | 1775887 |



|                   |           |              |                                            |          |         |         |
|-------------------|-----------|--------------|--------------------------------------------|----------|---------|---------|
| specific region 7 | APT_01635 | -            | hypothetical protein                       | AP014881 | 1775988 | 1776230 |
| specific region 7 | APT_01636 | -            | hypothetical protein                       | AP014881 | 1776836 | 1777993 |
| specific region 7 | APT_01637 | -            | endoribonuclease L-PSP                     | AP014881 | 1779135 | 1778647 |
| specific region 7 | APT_01638 | -            | MerR family transcriptional regulator      | AP014881 | 1779154 | 1779672 |
| specific region 7 | APT_01639 | -            | hypothetical protein                       | AP014881 | 1779748 | 1779993 |
| specific region 7 | APT_01640 | -            | hypothetical protein                       | AP014881 | 1780243 | 1781448 |
| specific region 7 | APT_01641 | -            | transposase                                | AP014881 | 1781562 | 1781885 |
| specific region 7 | APT_01642 | -            | transposase                                | AP014881 | 1781882 | 1782772 |
| specific region 7 | APT_01643 | -            | hypothetical protein                       | AP014881 | 1782849 | 1784465 |
| specific region 7 | APT_01644 | -            | hypothetical protein                       | AP014881 | 1784724 | 1784443 |
| specific region 7 | APT_01645 | -            | hypothetical protein                       | AP014881 | 1785141 | 1785986 |
| specific region 7 | APT_01646 | -            | 2-methylthioadenine synthetase             | AP014881 | 1785986 | 1786219 |
| specific region 7 | APT_01647 | -            | transposase                                | AP014881 | 1787106 | 1786216 |
| specific region 7 | APT_01648 | -            | transposase                                | AP014881 | 1787426 | 1787103 |
| specific region 7 | APT_01649 | -            | hypothetical protein                       | AP014881 | 1787504 | 1787782 |
| specific region 7 | APT_01650 | -            | hypothetical protein                       | AP014881 | 1788252 | 1788593 |
| specific region 7 | APT_01651 | -            | hypothetical protein                       | AP014881 | 1788854 | 1789942 |
| specific region 7 | APT_01652 | -            | hypothetical protein                       | AP014881 | 1790705 | 1790166 |
| specific region 7 | APT_01653 | -            | hypothetical protein                       | AP014881 | 1792331 | 1791369 |
| specific region 7 | APT_01654 | -            | AraC family transcriptional regulator      | AP014881 | 1793122 | 1792328 |
| specific region 7 | APT_01655 | -            | AraC family transcriptional regulator      | AP014881 | 1794631 | 1793666 |
| specific region 7 | APT_01656 | <i>aarC1</i> | acetyl-CoA hydrolase                       | AP014881 | 1796162 | 1794651 |
| specific region 7 | APT_01657 | -            | hypothetical protein                       | AP014881 | 1796535 | 1796669 |
| specific region 7 | APT_01658 | -            | hypothetical protein                       | AP014881 | 1796669 | 1797226 |
| specific region 7 | APT_01659 | -            | multidrug resistance transporter EmrB/QacA | AP014881 | 1798028 | 1797423 |
| specific region 7 | APT_01660 | -            | hypothetical protein                       | AP014881 | 1798187 | 1799236 |
| specific region 7 | APT_01661 | -            | hypothetical protein                       | AP014881 | 1799196 | 1800737 |
| specific region 7 | APT_01662 | -            | hypothetical protein                       | AP014881 | 1801132 | 1800872 |
| specific region 7 | APT_01663 | -            | hypothetical protein                       | AP014881 | 1802300 | 1802136 |
| specific region 7 | APT_01664 | -            | hypothetical protein                       | AP014881 | 1802411 | 1803343 |
| specific region 7 | APT_01665 | -            | transposase                                | AP014881 | 1803340 | 1803663 |
| specific region 7 | APT_01666 | -            | transposase                                | AP014881 | 1803660 | 1804550 |
| specific region 7 | APT_01667 | -            | hypothetical protein                       | AP014881 | 1804619 | 1804852 |
| specific region 7 | APT_01668 | -            | transposase                                | AP014881 | 1805622 | 1805194 |
| specific region 7 | APT_01669 | -            | hypothetical protein                       | AP014881 | 1806824 | 1805619 |
| specific region 7 | APT_01670 | -            | transposase                                | AP014881 | 1807848 | 1806979 |
| specific region 7 | APT_01671 | -            | transposase                                | AP014881 | 1808165 | 1807896 |
| specific region 7 | APT_01672 | -            | transposase                                | AP014881 | 1808982 | 1808245 |
| specific region 7 | APT_01673 | -            | hypothetical protein                       | AP014881 | 1810300 | 1809308 |
| specific region 7 | APT_01674 | -            | hypothetical protein                       | AP014881 | 1811211 | 1810297 |
| specific region 7 | APT_01675 | -            | hypothetical protein                       | AP014881 | 1812071 | 1811268 |
| specific region 7 | APT_01676 | -            | methyltransferase type 11                  | AP014881 | 1812948 | 1812202 |
| specific region 7 | APT_01677 | -            | hypothetical protein                       | AP014881 | 1813568 | 1813062 |
| specific region 7 | APT_01678 | -            | hypothetical protein                       | AP014881 | 1813927 | 1813640 |
| specific region 7 | APT_01679 | -            | hypothetical protein                       | AP014881 | 1814066 | 1813920 |
| specific region 7 | APT_01680 | -            | hypothetical protein                       | AP014881 | 1814326 | 1814090 |
| specific region 7 | APT_01681 | -            | phage repressor                            | AP014881 | 1814479 | 1815159 |
| specific region 7 | APT_01682 | -            | hypothetical protein                       | AP014881 | 1815622 | 1815957 |
| specific region 7 | APT_01683 | -            | DNA topoisomerase I                        | AP014881 | 1817397 | 1816435 |
| specific region 7 | APT_01684 | -            | exodeoxyribonuclease VII large subunit     | AP014881 | 1817814 | 1819739 |
| specific region 7 | APT_01685 | -            | hypothetical protein                       | AP014881 | 1819742 | 1819978 |
| specific region 7 | APT_01686 | -            | hypothetical protein                       | AP014881 | 1820354 | 1820115 |
| specific region 7 | APT_01687 | -            | hypothetical protein                       | AP014881 | 1820694 | 1820329 |
| specific region 7 | APT_01688 | -            | ankyrin                                    | AP014881 | 1821191 | 1820973 |
| specific region 7 | APT_01689 | <i>araC</i>  | transcriptional regulator AraC/YbtA        | AP014881 | 1821609 | 1822571 |
| specific region 7 | APT_01690 | -            | sulfotransferase                           | AP014881 | 1823391 | 1822561 |
| specific region 7 | APT_01691 | -            | hypothetical protein                       | AP014881 | 1824318 | 1823578 |
| specific region 7 | APT_01692 | -            | acyltransferase                            | AP014881 | 1824528 | 1826501 |
| specific region 7 | APT_01693 | -            | hypothetical protein                       | AP014881 | 1827195 | 1826638 |
| specific region 7 | APT_01694 | -            | hypothetical protein                       | AP014881 | 1827902 | 1827198 |
| specific region 7 | APT_01695 | -            | hypothetical protein                       | AP014881 | 1828196 | 1827990 |
| specific region 7 | APT_01696 | -            | hypothetical protein                       | AP014881 | 1829154 | 1828501 |
| specific region 7 | APT_01697 | -            | hypothetical protein                       | AP014881 | 1829798 | 1829160 |
| specific region 7 | APT_01698 | -            | hypothetical protein                       | AP014881 | 1831136 | 1831480 |
| specific region 7 | APT_01699 | -            | hypothetical protein                       | AP014881 | 1831710 | 1832888 |
| specific region 7 | APT_01700 | -            | hypothetical protein                       | AP014881 | 1832959 | 1833150 |
| specific region 8 | APT_01882 | -            | hypothetical protein                       | AP014881 | 2037725 | 2037865 |
| specific region 8 | APT_01883 | -            | transposase                                | AP014881 | 2038555 | 2037860 |
| specific region 8 | APT_01884 | -            | hypothetical protein                       | AP014881 | 2040360 | 2039008 |
| specific region 8 | APT_01885 | -            | transposase                                | AP014881 | 2041116 | 2040847 |
| specific region 8 | APT_01886 | -            | transposase                                | AP014881 | 2041682 | 2041209 |
| specific region 8 | APT_01887 | -            | hypothetical protein                       | AP014881 | 2042902 | 2041916 |
| specific region 8 | APT_01888 | -            | hypothetical protein                       | AP014881 | 2044560 | 2043190 |
| specific region 8 | APT_01889 | -            | hypothetical protein                       | AP014881 | 2046993 | 2044882 |
| specific region 8 | APT_01890 | -            | outer membrane protein                     | AP014881 | 2048946 | 2047225 |
| specific region 9 | APT_02058 | -            | phage-related minor tail protein           | AP014881 | 2242225 | 2236976 |
| specific region 9 | APT_02059 | -            | hypothetical protein                       | AP014881 | 2242951 | 2242235 |
| specific region 9 | APT_02060 | -            | hypothetical protein                       | AP014881 | 2243223 | 2242948 |
| specific region 9 | APT_02061 | -            | hypothetical protein                       | AP014881 | 2243717 | 2243304 |
| specific region 9 | APT_02062 | -            | phage major capsid protein HK97            | AP014881 | 2245020 | 2243785 |
| specific region 9 | APT_02063 | -            | hypothetical protein                       | AP014881 | 2245533 | 2245087 |
| specific region 9 | APT_02064 | -            | hypothetical protein                       | AP014881 | 2245940 | 2245530 |



|                     |           |             |                                                  |          |         |         |
|---------------------|-----------|-------------|--------------------------------------------------|----------|---------|---------|
| specific region 9-1 | APT_02075 | -           | hypothetical protein                             | AP014881 | 2255163 | 2255002 |
| specific region 9-1 | APT_02076 | -           | hypothetical protein                             | AP014881 | 2255319 | 2255792 |
| specific region 9-1 | APT_02077 | -           | hypothetical protein                             | AP014881 | 2256244 | 2255753 |
| specific region 10  | APT_02152 | -           | hypothetical protein                             | AP014881 | 2330772 | 2330581 |
| specific region 10  | APT_02153 | -           | hypothetical protein                             | AP014881 | 2331749 | 2331111 |
| specific region 10  | APT_02154 | -           | hypothetical protein                             | AP014881 | 2332094 | 2331873 |
| specific region 10  | APT_02155 | -           | hypothetical protein                             | AP014881 | 2332755 | 2333351 |
| specific region 10  | APT_02156 | <i>hsdM</i> | type I DNA methyltransferase M subunit HsdM      | AP014881 | 2333387 | 2334913 |
| specific region 10  | APT_02157 | <i>hsdS</i> | type I restriction-modification enzyme S subunit | AP014881 | 2334903 | 2336138 |
| specific region 10  | APT_02158 | <i>hsdR</i> | type I site-specific deoxyribonuclease           | AP014881 | 2336168 | 2339464 |
| specific region 10  | APT_02159 | -           | metal-dependent hydrolase                        | AP014881 | 2339467 | 2340204 |
| specific region 10  | APT_02160 | -           | hypothetical protein                             | AP014881 | 2340351 | 2341316 |
| specific region 10  | APT_02161 | -           | DEAD/DEAH box helicase                           | AP014881 | 2341313 | 2343952 |
| specific region 10  | APT_02162 | -           | hypothetical protein                             | AP014881 | 2344126 | 2344449 |
| specific region 10  | APT_02163 | -           | hypothetical protein                             | AP014881 | 2345307 | 2344672 |
| specific region 10  | APT_02164 | -           | plasmid stabilization protein                    | AP014881 | 2345605 | 2345856 |
| specific region 10  | APT_02165 | -           | plasmid stabilization protein                    | AP014881 | 2345853 | 2346158 |
| specific region 10  | APT_02166 | -           | hypothetical protein                             | AP014881 | 2346808 | 2346431 |

Table S3. List of experimentally validated mutations or insertion regions among two adapted strains, TH-3, and TI, of *A. pasteurianus* SKU1108.

| Reference sequence<br>GenBank acc. No. | Mutated position in chromosome |         | Gene        | Product                                                | Mode of mutation or insertion |                | Locus_tag             | Locus_tag (old) |
|----------------------------------------|--------------------------------|---------|-------------|--------------------------------------------------------|-------------------------------|----------------|-----------------------|-----------------|
|                                        | TH-3                           | TI      |             |                                                        | TH-3                          | TI             |                       |                 |
| AP014881                               | -                              | 84016   | -           | PAS/PAC sensor hybrid histidine kinase                 | -                             | H647Y          | APT_00078             | APT_0997        |
| AP014881                               | 190842                         | 190925  | <i>marR</i> | MarR family transcriptional regulator                  | R98H                          | Frameshift     | APT_00170             | APT_2081        |
| AP014881                               | -                              | 246307  | -           | hypothetical protein                                   | -                             | 1-bp insertion | Upstream of APT_00226 | APT_1701        |
| AP014881                               | 248856                         | -       | -           | hypothetical protein                                   | Frameshift                    | -              | APT_00228             | APT_1699        |
| AP014881                               | 250613                         | 250748  | <i>ansP</i> | L-asparagine permease                                  | Frameshift                    | Transposon     | APT_00229             | APT_1698        |
| AP014881                               | 268640                         | -       | -           | D-alanyl-D-alanine serine-type carboxypeptidase        | Q292L                         | -              | APT_00250             | APT_1083        |
| AP014881                               | 777821                         | -       | -           | hypothetical protein                                   | 6-bp deletion                 | -              | APT_00732             | APT_0215        |
| AP014881                               | 1385142                        | -       | <i>asmA</i> | lipopolysaccharide biogenesis periplasmic protein AsmA | Silent mutation               | -              | APT_01316             | APT_1527        |
| AP014881                               | 1565424                        | 1565468 | <i>dctA</i> | C4-dicarboxylate transporter                           | Transposon                    | Transposon     | APT_01446             | APT_2237        |
| AP014881                               | 1841392                        | -       | -           | hypothetical protein                                   | G164S                         | -              | APT_01702             | APT_1971        |
| AP014881                               | 1909918                        | -       | <i>glnD</i> | uridylyltransferase PII                                | 6-bp deletion                 | -              | APT_01763             | APT_1249        |
| AP014881                               | 1935892                        | -       | <i>mucR</i> | MucR family transcriptional regulator                  | 4-bp deletion                 | -              | APT_01785             | APT_1226        |
| AP014881                               | 2000030                        | -       | -           | glycosyl transferase                                   | Transposon                    | -              | Upstream of APT_01848 | APT_1213        |
| AP014881                               | -                              | 2266228 | <i>cytC</i> | cytochrome c-552 class I                               | -                             | C39S           | APT_02098             | APT_2167        |

Table S4. List of homologous genes of 24 thermotolerant genes conserved in three *A. pasteurianus* genomes. The locus\_tag of *A. tropicalis* SKU1100 strain is also shown.

| gene         | product                                            | locus_tag |             |              |           |
|--------------|----------------------------------------------------|-----------|-------------|--------------|-----------|
| SKU1108      | SKU1108                                            | SKU1108   | NBRC 3283   | 386B         | SKU1100   |
| -            | hypothetical protein                               | APT_00053 | APA01_00570 | APA386B_1540 | ATPR_0586 |
| <i>hpnB</i>  | glycosyl transferase                               | APT_00180 | APA01_01990 | APA386B_1687 | ATPR_1188 |
| <i>poxA</i>  | lysyl-tRNA synthetase                              | APT_00246 | APA01_02750 | APA386B_1758 | ATPR_0143 |
| <i>lepA</i>  | GTP-binding protein LepA                           | APT_00584 | APA01_06360 | APA386B_2137 | ATPR_0450 |
| -            | hypothetical protein                               | APT_00590 | APA01_06420 | APA386B_2143 | ATPR_0443 |
| <i>mmpA</i>  | putative metalloprotease MmpA                      | APT_00603 | APA01_06550 | APA386B_2156 | ATPR_0429 |
| <i>hsp20</i> | heat shock protein Hsp20                           | APT_00623 | APA01_06750 | APA386B_2177 | ATPR_3088 |
| -            | hypothetical protein                               | APT_00856 | APA01_09110 | APA386B_2415 | ATPR_2096 |
| <i>glnE</i>  | glutamate-ammonia-ligase adenylyltransferase       | APT_00857 | APA01_09120 | APA386B_2416 | ATPR_2097 |
| <i>yhdJ</i>  | DNA methyltransferase                              | APT_00916 | APA01_09690 | APA386B_2479 | ATPR_1965 |
| <i>minC</i>  | cell division inhibitor MinC                       | APT_00954 | APA01_10070 | APA386B_2523 | ATPR_0029 |
| -            | hypothetical protein                               | APT_00961 | APA01_10140 | APA386B_2530 | ATPR_0036 |
| <i>nhaK2</i> | Na <sup>+</sup> /H <sup>+</sup> antiporter         | APT_00984 | APA01_10370 | APA386B_2553 | ATPR_0071 |
| <i>smc</i>   | chromosome segregation protein SMC                 | APT_01022 | APA01_10730 | APA386B_2591 | ATPR_1424 |
| <i>ttg2C</i> | toluene ABC transporter periplasmic protein        | APT_01083 | APA01_11370 | APA386B_2657 | ATPR_0609 |
| <i>serA</i>  | D-3-phosphoglycerate dehydrogenase                 | APT_01136 | APA01_11910 | APA386B_2712 | ATPR_0874 |
| <i>rpoE</i>  | RNA polymerase sigma-E factor (sigma-24) protein 2 | APT_01242 | APA01_12650 | APA386B_100  | ATPR_2218 |
| <i>xdhA</i>  | xanthine dehydrogenase XdhA                        | APT_01267 | APA01_12900 | APA386B_125  | ATPR_2837 |
| -            | asparagine synthetase                              | APT_01828 | APA01_17360 | APA386B_665  | ATPR_2801 |
| -            | flavodoxin/nitric oxide synthase                   | APT_01927 | APA01_18620 | APA386B_778  | ATPR_1364 |
| <i>amiA</i>  | N-acetylmuramoyl-L-alanine amidase                 | APT_02041 | APA01_19860 | APA386B_897  | ATPR_3151 |
| <i>cysG</i>  | siroheme synthase                                  | APT_02252 | APA01_21940 | APA386B_1054 | ATPR_0022 |
| -            | hypothetical protein                               | APT_02411 | APA01_24150 | APA386B_1217 | ATPR_0162 |
| <i>htrA</i>  | endopeptidase DegP/Do                              | APT_02556 | APA01_25660 | APA386B_1373 | ATPR_1619 |
